# Supplementary material for: Prevalence of overweight and obesity in 15.8 million men aged 15–49 years in rural China from 2010 to 2014
Source: PubMed Central journal article supplement (PMC5504069; doi:10.1038/s41598-017-04135-4), 2017-07-10
Supplement: 41598_2017_4135_MOESM1_ESM.pdf [file 41598_2017_4135_MOESM1_ESM.pdf]

## **Prevalence of overweight and obesity in 15.8 million men aged 15-49 years in rural China: a population-based, cross-sectional study from 2010 to 2014**

Yuan He, An Pan, Yuanyuan Wang, Ying Yang, Jihong Xu, Ya Zhang, Dujia Liu, Qiaomei Wang, Haiping Shen, Yiping Zhang, Donghai Yan, Zuoqi Peng, Frank B. Hu, Xu Ma

### **Online Supplemental Material**

The following materials are included in the Online Supplemental Material.

1. Supplemental Table S1.
2. Supplemental Table S2.
3. Supplemental Figure S1.

**Supplemental Table S1.** Sample sizes and weighted proportion of demographic characteristics of women in rural China between 2010 and 2014.

**Supplemental Table S2.** Prevalence and trends of overweight and obesity according to the WHO criteria for reproductive-age men aged 15-49 years in rural China, 2010-2014

**Supplemental Figure S1.** Trends in prevalence of overweight and obesity among men and their female partners before conception, 2010-2014.

**Figure legends:** Overweight and obesity were defined according to the Chinese criteria: overweight,  $24.0 \leq \text{BMI} \leq 27.9 \text{ kg/m}^2$  and obesity,  $\text{BMI} \geq 28.0 \text{ kg/m}^2$ ; Couples: those with at least one of them being overweight or obese.

**Supplemental Table S1. Sample sizes and weighted proportion of demographic characteristics of reproductive women in rural China between 2010 and 2014. <sup>a</sup>**

|                         | <b>N</b>   | <b>percentage</b> |
|-------------------------|------------|-------------------|
| <b>Total</b>            | 15 997 739 | 100%              |
| <b>Age groups</b>       |            |                   |
| 15-29                   | 12 450 050 | 77.8              |
| 30-39                   | 3 206 772  | 20.1              |
| 40-49                   | 340 917    | 2.14              |
| <b>Ethnic origin</b>    |            |                   |
| Han                     | 13 960 474 | 90.6              |
| Uyghur                  | 360 889    | 2.3               |
| Zhuang                  | 281 826    | 1.8               |
| Miao                    | 163 347    | 1.1               |
| Manchu                  | 93 316     | 0.6               |
| Mongol                  | 88 073     | 0.6               |
| Yi                      | 90 461     | 0.6               |
| Hui                     | 170 795    | 1.1               |
| Tujia                   | 125 601    | 0.8               |
| Tibetan                 | 67 590     | 0.5               |
| <b>Region</b>           |            |                   |
| North                   | 1 355 720  | 8.5               |
| Northeast               | 643 822    | 4.0               |
| East                    | 4 272 896  | 26.7              |
| Central                 | 4 096 408  | 25.6              |
| South                   | 2 226 543  | 13.9              |
| Northwest               | 1 397 510  | 8.7               |
| Southwest               | 2 005 840  | 12.4              |
| <b>Education</b>        |            |                   |
| Primary school or below | 968 252    | 6.2               |
| Junior high school      | 9 762 112  | 62.4              |
| High school             | 2 839 046  | 18.2              |
| College or higher       | 2 063 777  | 13.2              |
| <b>GDP level</b>        |            |                   |
| Tertile 1               | 5 932 661  | 37.1              |
| Tertile 2               | 4 851 831  | 30.3              |
| Tertile 3               | 5 213 247  | 32.6              |

<sup>a</sup>The data are shown as percentage of participants in each year, and all proportion estimates were weighted using the China Population Census in 2010.

**Supplemental Table S2. Prevalence and trends of overweight and obesity according to the WHO criteria for reproductive-age men aged 15-49 years in rural China, 2010-2014<sup>a</sup>**

|                         | Overweight and obesity |                   | Obesity       |                 |
|-------------------------|------------------------|-------------------|---------------|-----------------|
|                         | Prevalence             | Increase          | Prevalence    | Increase        |
| <b>Total</b>            | 22.4 (22.3-22.5)       | 7.6 (7.3-7.8)     | 2.5 (2.4-2.6) | 1.1 (1.0-1.2)   |
| <b>Age groups</b>       |                        |                   |               |                 |
| 15-29                   | 17.9 (17.8-18.0)       | 4.2 (3.9-4.5)     | 2.3 (2.2-2.4) | 0.8 (0.7-0.9)   |
| 30-39                   | 25.5 (25.4-25.5)       | 9.2 (8.9-9.6)     | 3.0 (2.9-3.1) | 1.7 (1.6-1.8)   |
| 40-49                   | 24.0 (23.8-24.2)       | 8.6 (7.9-9.3)     | 2.2 (2.1-2.3) | 0.9 (0.7-1.2)   |
| <b>Ethnic origin</b>    |                        |                   |               |                 |
| Han                     | 22.8 (22.7-22.9)       | 8.3 (8.0-8.5)     | 2.6 (2.5-2.6) | 1.2 (1.1-1.3)   |
| Uyghur                  | 20.9 (20.6-21.2)       | 3.7 (2.6-4.9)     | 2.2 (2.1-2.4) | 0.5 (0.1-1.0)   |
| Zhuang                  | 13.0 (12.7-13.3)       | 7.7 (6.9-8.6)     | 0.9 (0.8-1.0) | 0.5 (0.3-0.7)   |
| Miao                    | 14.6 (14.2-15.0)       | 3.6 (1.9-5.3)     | 1.2 (1.0-1.3) | 0.2 (-0.3-0.7)  |
| Manchu                  | 28.6 (27.9-29.3)       | 5.0 (2.6-7.4)     | 3.6 (3.4-3.9) | 1.5 (0.6-2.3)   |
| Mongol                  | 29.5 (28.8-30.1)       | 6.4 (3.4-9.4)     | 4.4 (4.1-4.6) | 0.7 (-0.9-2.3)  |
| Yi                      | 15.0 (14.4-15.6)       | 3.6 (2.0-5.2)     | 1.4 (1.2-1.6) | 0.4 (0-0.8)     |
| Hui                     | 19.3 (18.8-19.9)       | -5.1 (-1.25-2.29) | 2.6 (2.3-2.9) | -0.2 (-1.2-0.8) |
| Tujia                   | 15.6 (15.1-16.1)       | 2.1 (-0.7-4.8)    | 1.1 (1.0-1.3) | 0.2 (-0.6-1.1)  |
| Tibetan                 | 13.8 (12.9-14.7)       | 6.8 (3.7-9.8)     | 1.3 (1.0-1.8) | 0.8 (0-1.5)     |
| <b>Region</b>           |                        |                   |               |                 |
| North                   | 30.3 (30.0-30.6)       | 10.4 (9.4-11.4)   | 4.4 (4.3-4.5) | 1.7 (1.3-2.1)   |
| Northeast               | 26.3 (26.0-26.5)       | 7.2 (6.3-8.1)     | 3.1 (3.0-3.2) | 1.3 (1.0-1.6)   |
| East                    | 27.5 (27.3-27.7)       | 8.7 (8.1-9.3)     | 3.3 (3.2-3.4) | 1.7 (1.5-1.9)   |
| Central                 | 18.4 (18.3-18.5)       | 5.1 (4.8-5.4)     | 1.7 (1.6-1.8) | 0.8 (0.7-0.9)   |
| South                   | 15.7 (15.6-15.8)       | 10.0 (9.6-10.4)   | 1.4 (1.3-1.5) | 1.0 (0.9-1.1)   |
| Northwest               | 16.1 (16.0-16.3)       | 8.3 (7.9-8.8)     | 1.5 (1.4-1.6) | 1.1 (1.0-1.3)   |
| Southwest               | 18.4 (18.3-18.6)       | 4.1 (3.6-4.6)     | 1.6 (1.5-1.7) | 0.4 (0.3-0.6)   |
| <b>Education</b>        |                        |                   |               |                 |
| Primary school or below | 18.3 (18.1-18.6)       | 4.5 (3.6-5.4)     | 1.9 (1.8-2.0) | 0.5 (0.1-0.9)   |
| Junior high school      | 21.0 (20.9-21.0)       | 6.7 (6.4-7.0)     | 2.2 (2.1-2.3) | 1.0 (0.9-1.2)   |
| High school             | 23.9 (23.7-24.1)       | 9.6 (8.9-10.2)    | 2.9 (2.8-3.0) | 1.5 (1.2-1.7)   |
| College or higher       | 30.0 (29.8-30.2)       | 7.7 (6.9-8.6)     | 3.6 (3.5-3.7) | 1.0 (0.6-1.5)   |
| <b>GDP level</b>        |                        |                   |               |                 |
| Tertile 1               | 21.3 (21.1-21.4)       | 7.0 (6.6-7.4)     | 2.4 (2.3-2.4) | 1.0 (0.8-1.1)   |
| Tertile 2               | 21.9 (21.8-22.0)       | 7.1 (6.6-7.5)     | 2.2 (2.1-2.3) | 0.9 (0.8-1.1)   |
| Tertile 3               | 24.7 (24.6-24.8)       | 9.1 (8.7-9.5)     | 3.0 (2.9-3.1) | 1.7 (1.5-1.8)   |

<sup>a</sup>Data are shown as prevalence (95% confidence interval), and all estimates were weighted using the China Population Census in 2010. Overweight and obesity were defined according to the WHO criteria: overweight,  $25.0 \leq \text{BMI} \leq 29.9 \text{ kg/m}^2$  and obesity,  $\text{BMI} \geq 30.0 \text{ kg/m}^2$ .

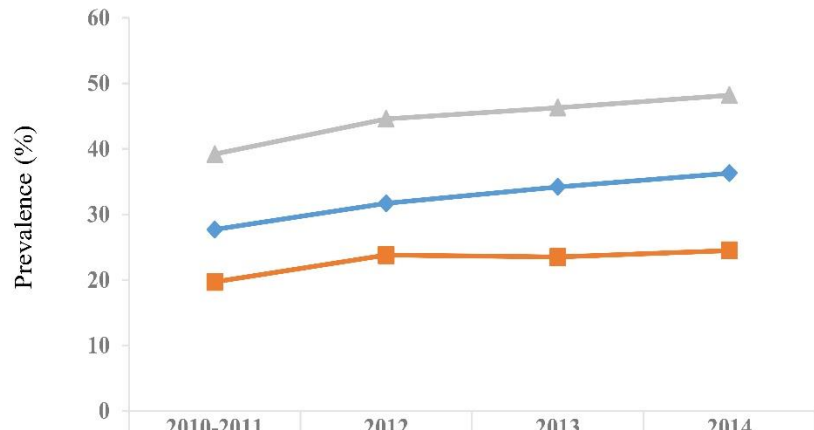

|         | 2010-2011 | 2012 | 2013 | 2014 |
|---------|-----------|------|------|------|
| Men     | 27.7      | 31.7 | 34.2 | 36.3 |
| Women   | 19.7      | 23.8 | 23.5 | 24.5 |
| Couples | 39.2      | 44.6 | 46.3 | 48.2 |
